# Supplementary material for: Immune State Conversion of the Mesenteric Lymph Node in a Mouse Breast Cancer Model
Source: MDPI journal article supplement (doi:10.3390/ijms231911035), 2022-09-20
Supplement: s1 [file s1]

## Supplementary Figure S1

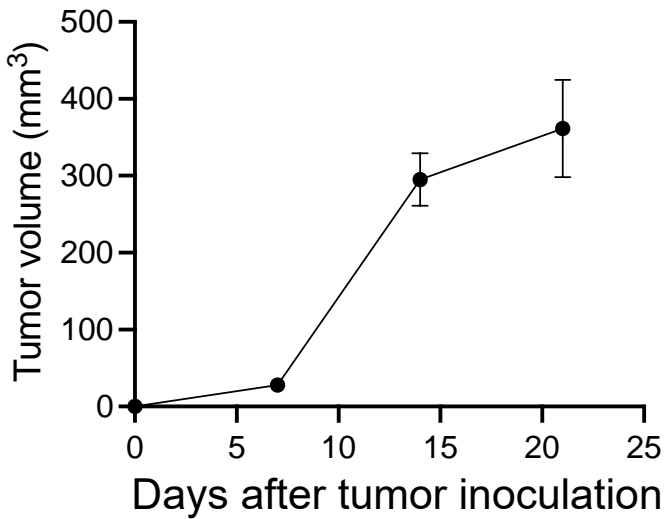

**Supplementary Figure S1. Primary tumor growth curve of 4T1 inoculated mice.** 4T1 cells were inoculated into the right flank of BALB/c mice. Tumor size was monitored and tumor volume was calculated using following formula; tumor volume = (length x width<sup>2</sup>)/2.

## Supplementary Figure S2

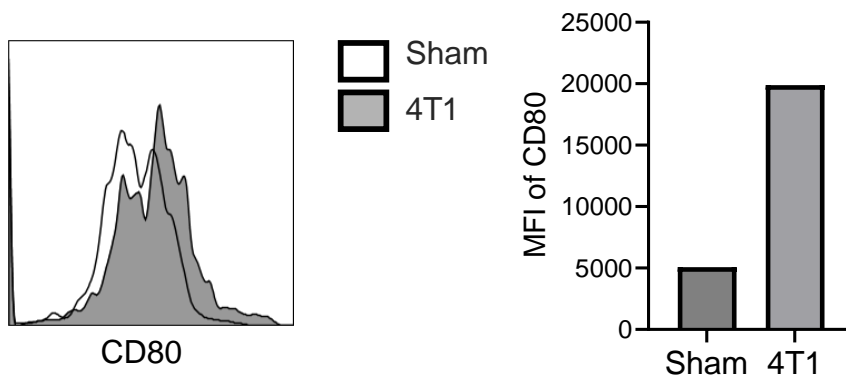

**Supplementary Figure S2. Evaluation of CD80 expression on DCs in 4T1 inoculated mice.** At day 21 of transplantation into the right flank, mLN from control (Sham) or tumor (4T1)-bearing mice were isolated. Flow cytometry histogram of CD80 in CD11c<sup>+</sup> DCs is shown.

## Supplementary Figure S3

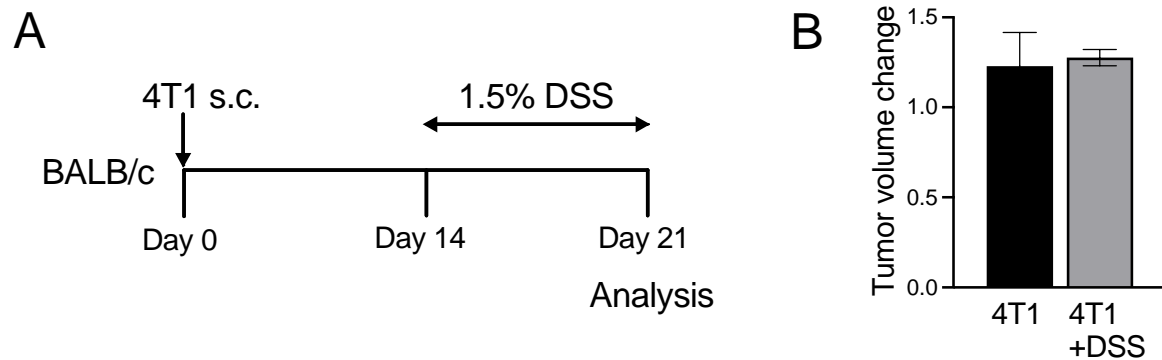

**Supplementary Figure S3. Establish the gut bacterial leakage model in 4T1 tumor inoculated mice.** (a) Experimental scheme. At 14 days of subcutaneous 4T1 transplantation, the mice were treated with 1.5% (wt/vol) DSS in drinking water for 7 days to generate the gut bacterial leakage model. (b) Relative tumor volume changes from day 14 to day 21 in 4T1 transplanted mice.

## Supplementary Figure S4

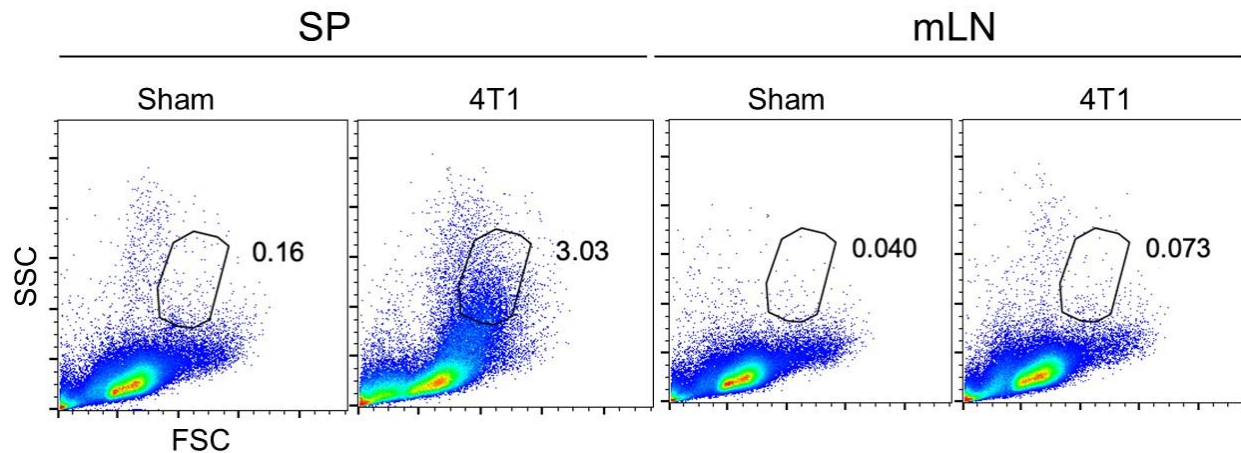

**Supplementary Figure S4. FSC/SSC plots of flow cytometric analysis of spleen and mLN in sham and 4T1 tumor inoculated mice.** The FSC/SSC plots showed a unique cell population (presumably metastasized 4T1 cells) in spleen of 4T1 tumor inoculated mice.
